# Supplementary material for: Large ferroelectricity in Hf0.85Ce0.15O2−δ polycrystalline thin films via lattice expansion
Source: Royal Society of Chemistry journal article supplement (doi:10.1039/d4qi01558d), 2024-01-01
Supplement: d4qi01558d1.pdf [file d4qi01558d1.pdf]

## Supplementary Materials

### Large Ferroelectricity in $\text{Hf}_{0.85}\text{Ce}_{0.15}\text{O}_{2-\delta}$ Polycrystalline Thin Films via Lattice Expansion

Hangren Li<sup>#, 1</sup>; Jie Tu<sup>#, 1</sup>; Guoqiang Xi<sup>#, 1</sup>; Xiuqiao Liu<sup>1</sup>; Xudong Liu<sup>1</sup>; Siyuan Du<sup>1</sup>;  
Dongfei Lu<sup>1</sup>; Da Zu<sup>2</sup>; Yuxuan Zhang<sup>3</sup>; Qingxiao Wang<sup>4</sup>; Dongxing Zheng<sup>5</sup>; Xixiang  
Zhang<sup>5</sup>; Jianjun Tian<sup>1</sup>; Linxing Zhang<sup>1, \*</sup>

1. Institute for Advanced Materials Technology, University of Science and Technology Beijing, Beijing 100083, China
2. Key Laboratory of Low Dimensional Materials and Application Technology of Ministry of Education, School of Materials Science and Engineering, Xiangtan University, Hunan 411105, China
3. School of Material and Metallurgy, Inner Mongolia University of Science and Technology, Baotou 014010, China.
4. Corelab, King Abdullah University of Science and Technology (KAUST), Thuwal 23955-6900, Saudi Arabia.
5. Physical Science and Engineering Division, King Abdullah University of Science and Technology (KAUST), Thuwal 23955-6900, Saudi Arabia.

# These authors contributed equally to this work.

## SUPPLEMENTARY NOTES

### 1. Preparation of other thin films

To prepare the precursor, the required amount of cerium nitrate hexahydrate ( $\text{Ce}(\text{NO}_3)_3 \cdot 6\text{H}_2\text{O}$ , Aladdin, 99.95%) and hafnium 2, 4-glutarate ( $\text{C}_{20}\text{H}_{28}\text{HfO}_8$ , Kindo, 97%) is dissolved in acetic acid, then 2, 4-pentanedione is added. A solution with a metal ion concentration of 0.1 mol/L is obtained, in which the ratio of acetic acid to 2, 4-pentanedione is 3:2. Finally, the mixed solvent was heated on a hot table at 75 °C for 2h to obtain a transparent precursor solution. In the preparation of Hf-Ce-O solid solution thin films, the precursor solution is spin coated on a  $10 \times 10 \text{ mm}^2$  Si/SiO<sub>2</sub>/Ti/Pt substrate and rotated at a high speed of 3500 rpm for 30 s. On the hot table, the water in the film was removed by heating at 120 °C for 3 min, and the organic solvent was removed by heating at 300 °C for 3 min. Once every 3 layers (total of 9 layers) for coating annealing treatment, then, using the hostler furnace respectively for Hf<sub>(1-x)</sub>Ce<sub>x</sub>O<sub>2-δ</sub> ( $x = 0.6/0.9/0.12/0.15/0.18/0.21$ ) under the 825 °C annealing, the annealing time about 20 min.

### 2. Effect of Pt electrode

XRD, XPS, STEM, and Raman measurements were tested without the presence of Pt electrode. The interfacial strain of the electrode can also affect the phase structure of HfO<sub>2</sub>-based thin films [1]. However, the Pt electrode has the smaller surface tension than other common electrodes [2, 3]. In addition, the *P-E* loops of Hf<sub>0.85</sub>Ce<sub>0.15</sub>O<sub>2-δ</sub> thin films with different thickness (Figure S4) suggest that the surface energy effect at the bottom interface (film/substrate) is not the key factor in O phase stability for the Ce substituted HfO<sub>2</sub> system. All the samples in this paper were tested for ferroelectric properties using Pt electrode, which indicates that the high remanent polarization of the T4 samples is indeed due to the stabilization of the O phase by the introduction of Ce elements and the dipole distortion caused by lattice expansion. Therefore, the interfacial strain introduced by the Pt electrode is not considered to be the key factor for the improvement of properties of Hf<sub>0.85</sub>Ce<sub>0.15</sub>O<sub>2-δ</sub> thin films.

### 3. Impact of volume on the remanent polarization of HfO<sub>2</sub>

In ferroelectrics, spontaneous polarization comes from the non-coincidence of positive and negative charge centers, so the value of spontaneous polarization is the sum of the product of charge (valence) and static displacement of each ion. However, in real crystals, the charge of the ion is often not the same as the valence, as the distribution of electron clouds of the same element in different crystals can vary. In order to accurately evaluate the charge of each HfO<sub>2</sub> ion, the processing method of Born effective charge is introduced, that is, the partial derivative of the electric dipole moment with respect to ion displacement is solved in the calculation, and the Born effective charge ( $Z^*$ ) is obtained. The results of the calculations are shown in Table S1-S15. The spontaneous polarization of HfO<sub>2</sub> crystals can be estimated by the formula (1-1) if the variation of polarization with ion displacement is approximated as a linear process.

$$P = \frac{e}{V} \sum_{i=1}^m Z_i^* \Delta u_i \quad (1 - 1)$$

$P$  - Spontaneous polarization of ferroelectrics (C/m<sup>2</sup>)

$e$  - Unit charge number ( $1.6 \times 10^{-19}$  C)

$V$  - Unit cell volume (m<sup>3</sup>)

$Z_i^*$  - Born effective charge on the  $i$ -th atom

$\Delta u_i$  - Ferroelectric shift of the  $i$ -th atom (m)

In this paper, we calculate the spontaneous polarization strength of HfO<sub>2</sub> using the  $Pbca$  phase as a reference phase. The crystal structure of the ferroelectric  $Pca2_1$  phase has a point group of  $Imm_2$  and is asymmetric only along the  $z$ -axis, while the  $x$ -axis and  $y$ -axis are symmetric, so that changes in the  $x$ -axis and  $y$ -axis have little effect on the ferroelectric polarization value.

#### 4. Role of Ce element

Consider equation (1-1), The main factors affecting the macroscopic ferroelectric polarization of ferroelectric thin films are the unit cell volume and the Born effective charge of the system. We choose Ce elements with high Born effective charges to stabilize the orthorhombic phase [4]. In addition, the relative ratios of oxygen vacancy

( $O_V$ ) and lattice oxygen ( $O_L$ ) as well as  $Ce^{3+}$  and  $Ce^{4+}$  in the  $HfO_2$ -based films can be effectively controlled by temperature to further control unit-cell volume [5]. Therefore, the introduction of the Ce element provides the dual effect of stabilizing the O-phase and the lattice expansion. Most reports still attribute improvements in ferroelectricity only to the size effects, crystallinity, and stability of the orthorhombic phase [6, 7], both experimental and theoretical studies. Our work provides a new way to break through the performance barrier of hafnium-based polycrystalline thin films.

## **5. DFT calculation**

### **5.1 Phase stability calculation model**

The calculations were carried out by building a  $1 \times 1 \times 1$  unit cell using the Castep-selected fictitious crystal approximation (*Materials Studio 2019*), with Ce concentrations of 0/3/6/9/12/15/18/21 % in the C/O/T/M phase, respectively. The electron exchange-correlation interactions were explained by the Generalised Gradient Approximation (GGA) [8], the electron exchange dependent interaction is explained by Perdew-Burke-Ernzerhof (PBE). The plane wave basis cut-off energy was determined to be 550 eV through convergence testing. A  $3 \times 3 \times 3$  Monkhorst-Pack k-point grid was used. The energy is  $1.0 \times 10^{-5}$ , with a maximum force of 0.03 eV/Å, a maximum stress of 0.05 GPa, and a maximum displacement of 0.001 Å.

### **5.2 Born effective charge calculation of ferroelectric polarization**

The specific values of Born effective charge are obtained by running in the Castep-selected fictitious crystal approximation (*Materials Studio 2019*). The electron exchange-correlation interactions were explained by the GGA [8], the electron exchange dependent interaction is explained by PBE. A  $3 \times 3 \times 3$  Monkhorst-Pack k-point grid was used. The convergence criterion for the energy change, maximum force, maximum stress, and maximum displacement was set to 750 eV,  $10^{-5}$  eV/atom, 0.03 eV/Å, 0.05 GPa, and  $10^{-3}$  Å.

## SUPPLEMENTARY FIGURES

### 1. DFT calculations of the effect of different concentrations of Ce-sites on the stability of the hafnium oxide phase.

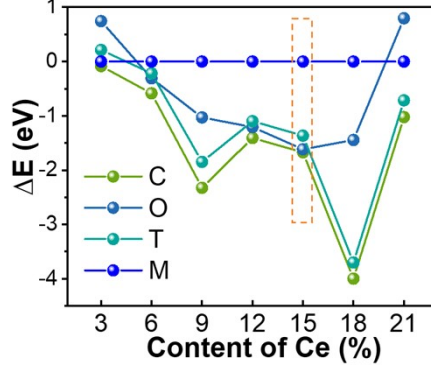

**Figure S1.** DFT calculations were conducted to determine the phase stability of  $\text{Hf}_{(1-x)}\text{Ce}_x\text{O}_{2-\delta}$  with varying Ce concentrations ( $x = 0/0.03/0.06/0.09/0.12/0.15/0.18/0.21$ ).

The stability of the C/O/T phase compared to the M phase following Ce doping in  $\text{HfO}_2$  was calculated using DFT. To investigate the stability of the doped  $\text{HfO}_2$ , we analyzed the change in relative energy  $\Delta E_r$  for each phase. The calculation method used is defined (1-2). According to the calculations in Figure S1, the O phase is expected to exhibit higher stability at Ce = 15 %. Furthermore, this is consistent with the findings obtained from XRD and electric hysteresis loop measurements. Where,  $E_{\xi(\text{doped})}$  and  $E_{\xi(\text{pure})}$  represent the total energy of C/O/T phase with and without impurities, respectively.

$$\Delta E_r = \frac{E_{\xi(\text{doped})} - E_{m(\text{doped})}}{E_{\xi(\text{pure})} - E_{m(\text{pure})}} \quad (1 - 2)$$

**2. Phase of  $\text{Hf}_{1-x}\text{Ce}_x\text{O}_{2-\delta}$  ( $x = 0.6/0.9/0.12/0.15/0.18/0.21$ ) thin films changes with varying Ce concentrations.**

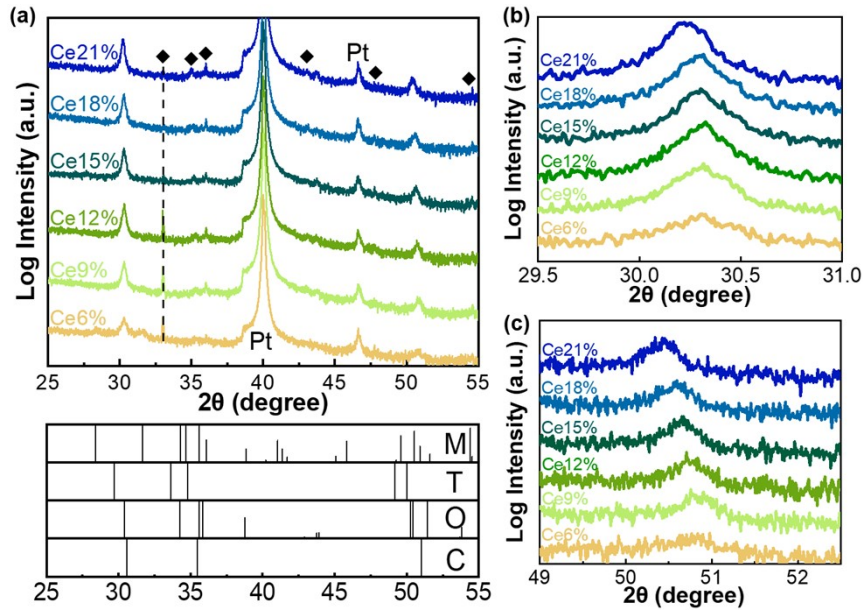

**Figure S2.** (a) XRD  $\text{Hf}_{1-x}\text{Ce}_x\text{O}_{2-\delta}$  ( $x = 0.6/0.9/0.12/0.15/0.18/0.21$ ). (b) and (c) XRD detail magnification.

XRD analysis reveals that the samples exhibit some M-phase content at the Ce concentration of 6 %. The characteristic peak of the M-phase disappears when the Ce content reaches 9 % or above. This suggests that the introduction of Ce has the potential to suppress M-phase production and encourage O-phase formation. Figures S2 (b) and (c) illustrate that with the increase in Ce content, there is a shift towards a smaller angle for  $(111)_O$  and  $(220)_O$ . This phenomenon occurs because Ce atoms have a larger radius than Hf atoms, leading to an increase in the volume of the entire unit-cell of the thin films. It is important to note that we use “◆” to label diffraction peaks originating from the Pt/Ti/SiO<sub>2</sub>/Si substrates. They come from the diffraction of the substrate with respect to X-rays of other wavelengths, such as the diffraction peak of Si (004) plane at  $\sim 33.19^\circ$  from the Cu  $K_\alpha$  X-ray diffraction with second harmonics ( $\sim 0.77 \text{ \AA}$ ), the diffraction peak of Pt (111) plane at  $\sim 36.19^\circ$  from Cu  $K_\beta$  X-rays ( $\sim 1.39 \text{ \AA}$ ), the diffraction peak of Pt (200) plane at  $\sim 46.9^\circ$  from Cu  $K_\alpha$  X-rays ( $\sim 1.54 \text{ \AA}$ ), and the diffraction peak of Si (004) plane at  $\sim 54.7^\circ$  from W  $L_{\beta 2}$  X-rays ( $\sim 1.24 \text{ \AA}$ ). The peak of  $\sim 33.19^\circ$  was sometimes absent, which might be due to the fact that vector superposition

of X-rays is difficult to occur in a common XRD diffractometer.

### 3. Typical $P$ - $E$ loops of $\text{Hf}_{1-x}\text{Ce}_x\text{O}_{2-\delta}$ ( $x = 0.6/0.9/0.12/0.15/0.18/0.21$ ) thin films

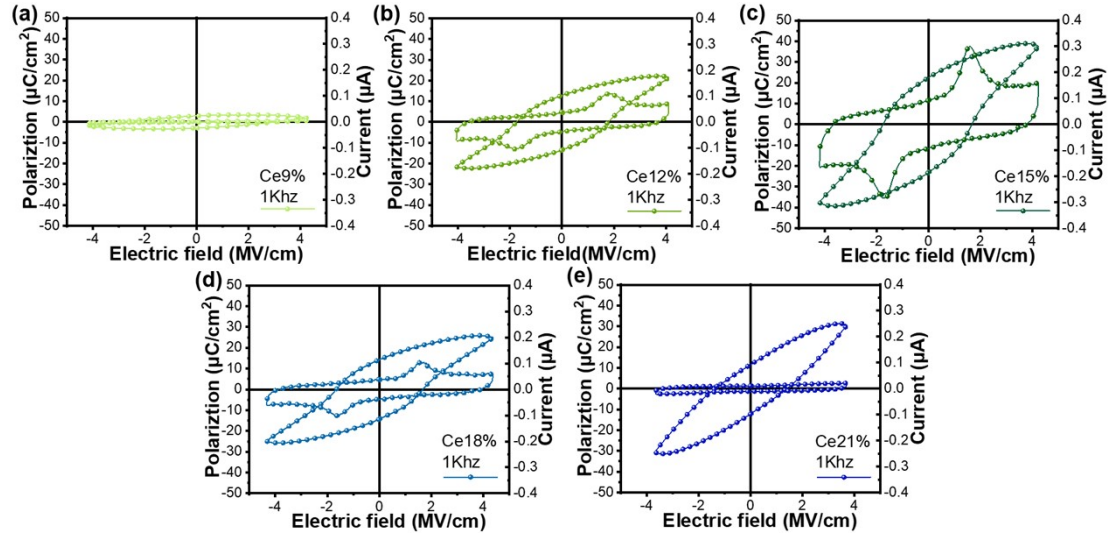

**Figure S3.** Ferroelectric polarization for  $\text{Hf}_{1-x}\text{Ce}_x\text{O}_{2-\delta}$  ( $x = 0.6/0.9/0.12/0.15/0.18/0.21$ ) thin films.

Figure S3. illustrates the trend of sample  $P_r$  value as a function of increasing Ce doping concentration, with Ce of 15 % exhibiting the highest  $P_r$  value.

#### 4. Typical $P$ - $E$ loops of $\text{Hf}_{0.85}\text{Ce}_{0.15}\text{O}_{2-\delta}$ (different thicknesses) thin films

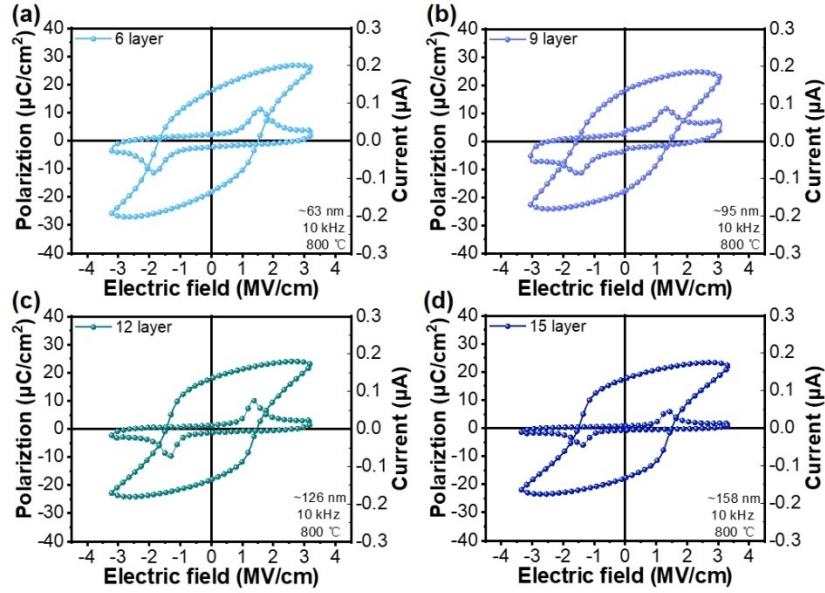

**Figure S4.** Ferroelectric properties of  $\text{Hf}_{0.85}\text{Ce}_{0.15}\text{O}_{2-\delta}$  thin films with different layers. (a) 6 layers about 63 nm. (b) 9 layers about 95 nm. (c) 12 layers about 126 nm. (d) 15 layers about 158 nm. The layer means the spin-coating number in the preparation of the film.

Figure S4 shows the influence of  $P_r$  value of  $\text{Hf}_{0.85}\text{Ce}_{0.15}\text{O}_{2-\delta}$  thin films with thickness. The ferroelectric remanent polarization value of  $\text{Hf}_{0.85}\text{Ce}_{0.15}\text{O}_{2-\delta}$  thin films has no obvious dependence on thickness. This indicates the thickness with surface energy effect is not the key factor in O phase stability for present system. The reason of the remanent polarization enhancement is considered to be derived from the combined effect of the stabilization of the thin films O phase by the introduction of Ce elements and the increase of the dipole distortion.



### 5. Effect of temperature on ferroelectricity of $\text{Hf}_{0.85}\text{Ce}_{0.15}\text{O}_{2-\delta}$ thin films (T1-T5)

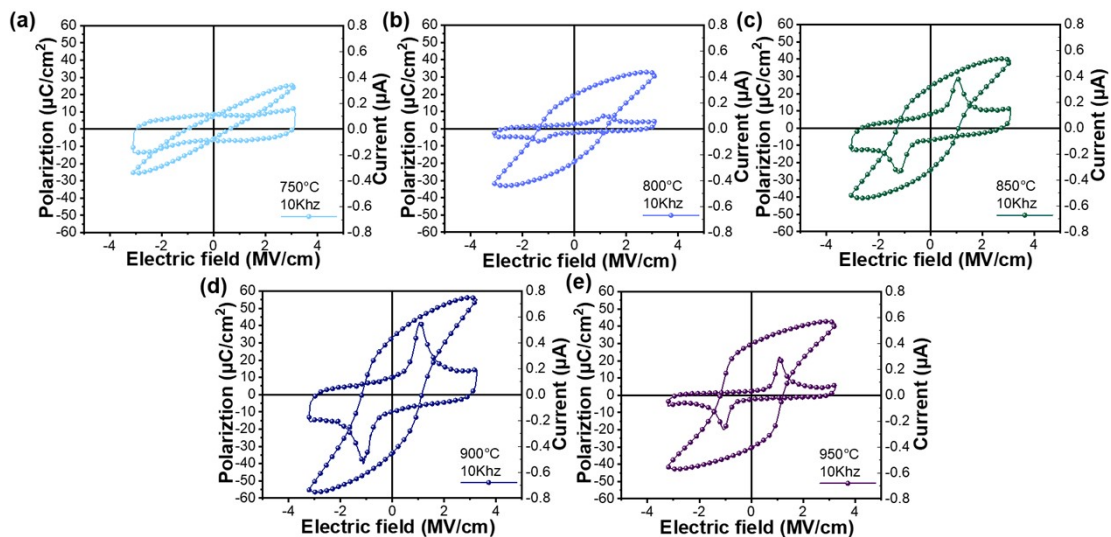

**Figure S5.** The ferroelectric properties of  $P$ - $E$  loops of  $\text{Hf}_{0.85}\text{Ce}_{0.15}\text{O}_{2-\delta}$  thin films at different temperatures were determined at room temperature.

## 6. Phase images of $\text{Hf}_{0.85}\text{Ce}_{0.15}\text{O}_{2-\delta}$ thin films (T1-T5) by PFM

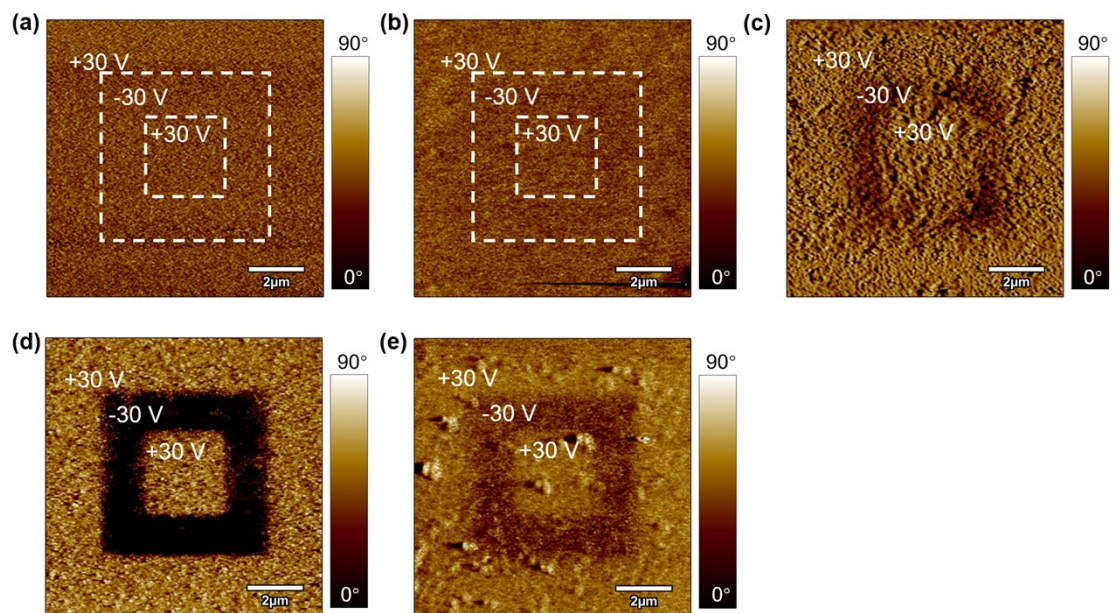

**Figure S6.** Phase images of  $\text{Hf}_{0.85}\text{Ce}_{0.15}\text{O}_{2-\delta}$  thin films. (a) T1. (b) T2. (c) T3. (d) T4. (e) T5.

### 7. Amplitude information images of $\text{Hf}_{0.85}\text{Ce}_{0.15}\text{O}_{2-\delta}$ thin films (T1-T5) by PFM

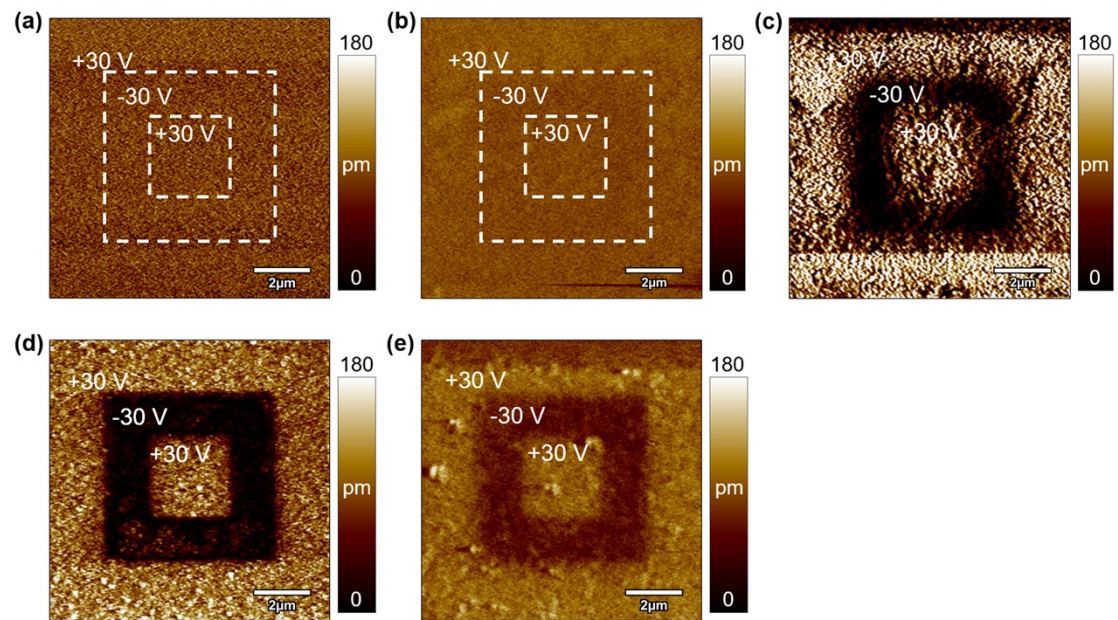

**Figure S7.** Amplitude images of  $\text{Hf}_{0.85}\text{Ce}_{0.15}\text{O}_{2-\delta}$  thin films. (a) T1. (b) T2. (c) T3. (d) T4. (e) T5.

**8. PUND triangle wave type applied on  $\text{Hf}_{0.85}\text{Ce}_{0.15}\text{O}_{2-\delta}$  thin films (T4)**

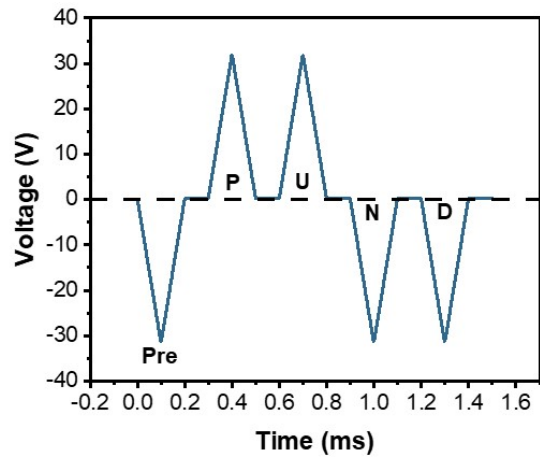

**Figure S8.** Time versus triangular wave voltage curve in PUND mode.

## 9. Ferroelectric fatigue and leakage current test

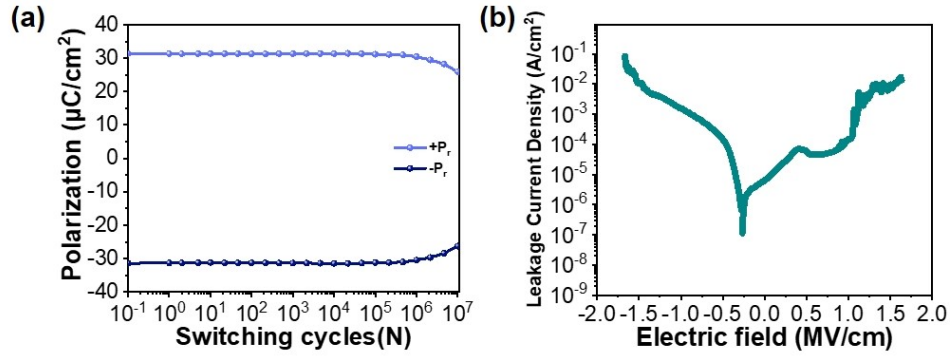

**Figure S9.** (a) Ferroelectric fatigue test of T4 samples. We applied fatigue using a fatigue frequency of 100 kHz and a fatigue electric field of about 2 MV/cm, which is closed to twice the coercive field. As in the test of the ferroelectric hysteresis loops in the text, we read the  $P$ - $E$  loops using a frequency of 10 kHz and an electric field of about 3 MV/cm. (b) Leakage current test of T4 samples.

## 10. Morphology of $\text{Hf}_{0.85}\text{Ce}_{0.15}\text{O}_{2-\delta}$ thin films (T1-T5)

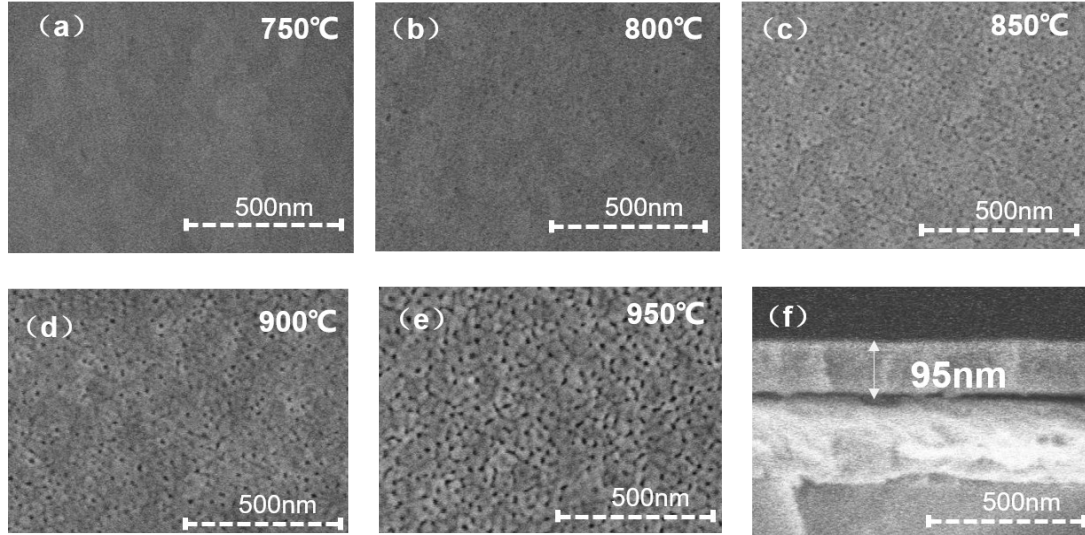

**Figure S10.** The SEM images for  $\text{Hf}_{0.85}\text{Ce}_{0.15}\text{O}_{2-\delta}$  thin films. (a) T1. (b) T2. (c) T2. (d) T4. (e) T5. The sample's roughness increases gradually with temperature increase. With the increase of the preparation temperature, the number of pores on the ferroelectric thin films surface will increase (Figure S10d) [9]. This may cause the leakage current of the thin films to rise. The TEM cross-section analysis revealed there are some pores on the surface of the  $\text{Hf}_{0.85}\text{Ce}_{0.15}\text{O}_{2-\delta}$  thin films while the pores inside the film are relative few (Figure 2d). In leakage current tests, T4 samples had small leakage that is only  $10^{-7}$  A/cm<sup>2</sup> (Figure S9). This value also matches the leakage current reported ( $\sim 10^{-7}$  A/cm<sup>2</sup>) in the previous paper [10]. This indicates that there are fewer internal defects in the thin films. Although there are some surface pores, they will have little impact on the use of future devices.

## 11. TEM of $\text{Hf}_{0.85}\text{Ce}_{0.15}\text{O}_{2-\delta}$ thin films

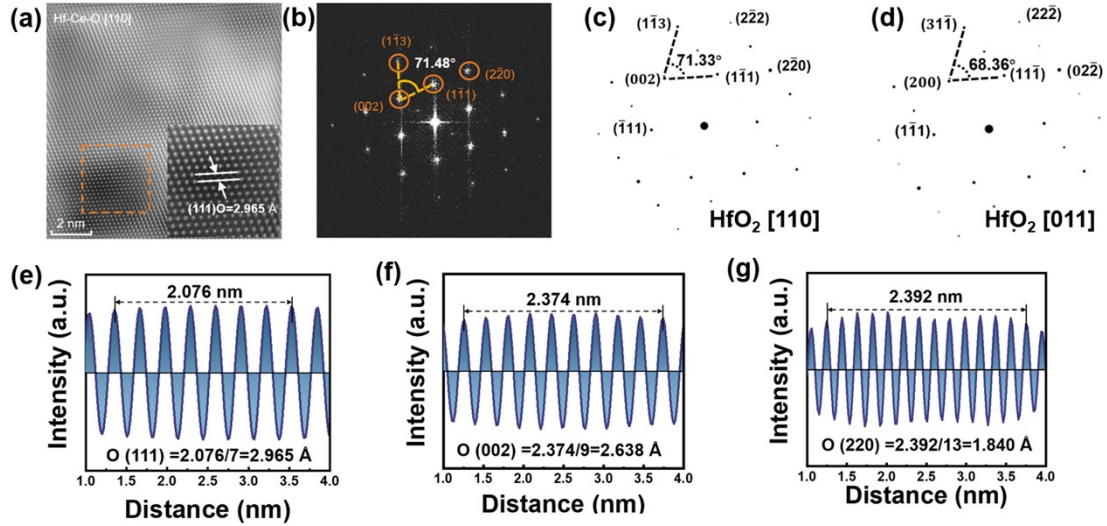

**Figure S11.** The O-phase crystal plane spacing was measured by TEM. (a) Atomic-scale HAADF-STEM images of  $\text{Hf}_{0.85}\text{Ce}_{0.15}\text{O}_{2-\delta}$  thin films. (b) Corresponding FFT pattern of Figure S11 (a). (c) Standard FFT pattern of  $\text{HfO}_2$  along the [110] direction by simulating. (d) Standard FFT pattern of  $\text{HfO}_2$  along the [011] direction by simulating. (e, f, g) Interplanar spacing of O (111) (e), O (002) (f), and O (220) (g).

As shown in Fig. S11, the interplanar spacing of  $(111)_\text{O}/(220)_\text{O}/(002)_\text{O}$  is  $2.965 \text{ \AA}/1.840 \text{ \AA}/2.638 \text{ \AA}$ , respectively. Since phase O [110] is similar to the diffraction spots of [011], it is impossible to determine which axial arrangement is based on the FFT arrangement. But we can find that in the standard  $\text{HfO}_2$  diffraction spot in the [110] axial  $(11\bar{3}) - (002) - (1\bar{1}1)$  angle is  $71.33^\circ$ , and in the [011] axial  $(31\bar{1}) - (200) - (11\bar{1})$  angle is  $68.36^\circ$ . In our chosen area  $(11\bar{3}) - (002) - (1\bar{1}1)$  has an angle of  $71.48^\circ$ , so we consider the region to be [110] axial.



12. High resolution O 1s and Ce 3d XPS spectra for  $\text{Hf}_{0.85}\text{Ce}_{0.15}\text{O}_{2-\delta}$  thin films (T2, T3, and T5).

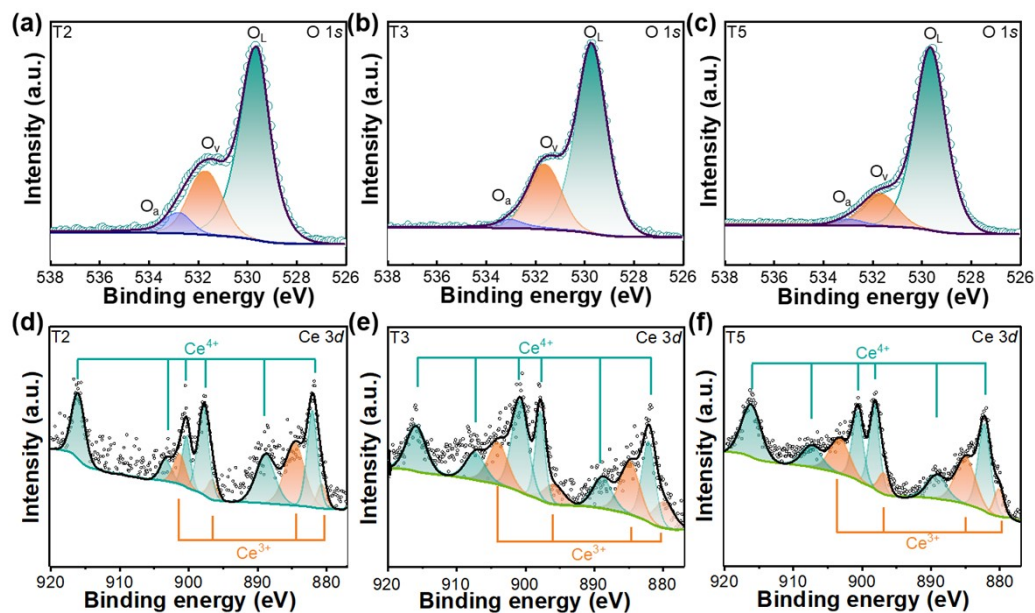

**Figure S12.** High resolution XPS spectra of (a) T2, (b) T3, and T5 O 1s XPS spectra for  $\text{Hf}_{0.85}\text{Ce}_{0.15}\text{O}_{2-\delta}$  thin films. (d) T2, (e) T3, and (f) T5 Ce 3d XPS spectra for  $\text{Hf}_{0.85}\text{Ce}_{0.15}\text{O}_{2-\delta}$  thin films.



**Table S1.**  $Pca2_1$  of  $HfO_2$  ( $a = 5.234 \text{ \AA}$ ,  $b = 5.010 \text{ \AA}$ ,  $c = 5.043 \text{ \AA}$ .  $P_r \sim 49.28 \mu C/cm^2$ )

| Element | Born Effective Charges |          |          |          |
|---------|------------------------|----------|----------|----------|
|         |                        | $x$      | $y$      | $z$      |
| O1      | $x$                    | -2.31245 | -0.65657 | 0.25144  |
|         | $y$                    | -0.80245 | -2.92394 | -0.7594  |
|         | $z$                    | 0.1667   | -0.8019  | -2.62735 |
| O2      | $x$                    | -2.41452 | -0.26913 | 0.10436  |
|         | $y$                    | -0.28531 | -2.60219 | 0.46477  |
|         | $z$                    | 0.11885  | 0.53252  | -2.59385 |
| O3      | $x$                    | -2.31245 | -0.6565  | -0.2515  |
|         | $y$                    | -0.80243 | -2.92387 | 0.75938  |
|         | $z$                    | -0.16676 | 0.80188  | -2.62739 |
| O4      | $x$                    | -2.4145  | -0.26914 | -0.10436 |
|         | $y$                    | -0.28526 | -2.60218 | -0.46478 |
|         | $z$                    | -0.11883 | -0.53252 | -2.59386 |
| O5      | $x$                    | -2.31246 | 0.65653  | 0.25154  |
|         | $y$                    | 0.8024   | -2.92386 | 0.75933  |
|         | $z$                    | 0.16681  | 0.80182  | -2.62737 |
| O6      | $x$                    | -2.41455 | 0.26917  | 0.1044   |
|         | $y$                    | 0.28533  | -2.60221 | -0.46478 |
|         | $z$                    | 0.11885  | -0.53254 | -2.59388 |
| O7      | $x$                    | -2.31246 | 0.65655  | -0.2515  |
|         | $y$                    | 0.80248  | -2.92392 | -0.75936 |
|         | $z$                    | -0.1668  | -0.80187 | -2.62734 |
| O8      | $x$                    | -2.41449 | 0.26911  | -0.10435 |
|         | $y$                    | 0.28524  | -2.60221 | 0.46481  |
|         | $z$                    | -0.11881 | 0.53258  | -2.59386 |
| Hf1     | $x$                    | 4.72698  | -0.26028 | -0.1434  |
|         | $y$                    | 0.02895  | 5.52618  | 0.20101  |
|         | $z$                    | -0.06106 | 0.14643  | 5.22126  |
| Hf2     | $x$                    | 4.72697  | -0.26028 | 0.14338  |
|         | $y$                    | 0.02895  | 5.5261   | -0.20098 |
|         | $z$                    | 0.06105  | -0.14642 | 5.22123  |
| Hf3     | $x$                    | 4.72696  | 0.26026  | -0.14336 |
|         | $y$                    | -0.02894 | 5.52603  | -0.20095 |
|         | $z$                    | -0.06101 | -0.14638 | 5.22121  |
| Hf4     | $x$                    | 4.72696  | 0.26028  | 0.14336  |
|         | $y$                    | -0.02896 | 5.52606  | 0.20094  |

|  |          |         |         |         |
|--|----------|---------|---------|---------|
|  | <b>z</b> | 0.06102 | 0.14641 | 5.22122 |
|--|----------|---------|---------|---------|

**Table S2.**  $Pca2_1$  of  $HfO_2$  ( $a = 5.234 \text{ \AA}$ ,  $b = 5.010 \text{ \AA}$ ,  $c = 5.243 \text{ \AA}$ ,  $P_r \sim 51.54 \mu\text{C}/\text{cm}^2$ )

| Element | Born Effective Charges |          |          |          |
|---------|------------------------|----------|----------|----------|
|         |                        | <b>x</b> | <b>y</b> | <b>z</b> |
| O1      | <b>x</b>               | -2.41395 | -0.8725  | 0.19909  |
|         | <b>y</b>               | -0.9558  | -2.86695 | -0.79248 |
|         | <b>z</b>               | -0.0003  | -0.78693 | -2.92619 |
| O2      | <b>x</b>               | -2.41494 | -0.8728  | -0.19885 |
|         | <b>y</b>               | -0.95574 | -2.86617 | 0.79164  |
|         | <b>z</b>               | 0.00065  | 0.78612  | -2.92539 |
| O3      | <b>x</b>               | -2.41395 | -0.8725  | -0.19909 |
|         | <b>y</b>               | -0.9558  | -2.86695 | 0.79248  |
|         | <b>z</b>               | 0.0003   | 0.78693  | -2.92619 |
| O4      | <b>x</b>               | -2.41494 | -0.8728  | 0.19885  |
|         | <b>y</b>               | -0.95574 | -2.86617 | -0.79164 |
|         | <b>z</b>               | -0.00065 | -0.78612 | -2.92539 |
| O5      | <b>x</b>               | -2.41395 | 0.8725   | 0.19909  |
|         | <b>y</b>               | 0.9558   | -2.86695 | 0.79248  |
|         | <b>z</b>               | -0.0003  | 0.78693  | -2.92619 |
| O6      | <b>x</b>               | -2.41494 | 0.8728   | -0.19885 |
|         | <b>y</b>               | 0.95574  | -2.86617 | -0.79164 |
|         | <b>z</b>               | 0.00065  | -0.78612 | -2.92539 |
| O7      | <b>x</b>               | -2.41395 | 0.8725   | -0.19909 |
|         | <b>y</b>               | 0.9558   | -2.86695 | -0.79248 |
|         | <b>z</b>               | 0.0003   | -0.78693 | -2.92619 |
| O8      | <b>x</b>               | -2.41494 | 0.8728   | 0.19885  |
|         | <b>y</b>               | 0.95574  | -2.86617 | 0.79164  |
|         | <b>z</b>               | -0.00065 | 0.78612  | -2.92539 |
| Hf1     | <b>x</b>               | 4.82889  | -0.00048 | -0.00047 |
|         | <b>y</b>               | 0.00023  | 5.73311  | 0.28556  |
|         | <b>z</b>               | -0.00004 | 0.42668  | 5.85158  |
| Hf2     | <b>x</b>               | 4.82889  | -0.00048 | 0.00047  |
|         | <b>y</b>               | 0.00023  | 5.73311  | -0.28556 |
|         | <b>z</b>               | 0.00004  | -0.42668 | 5.85158  |
| Hf3     | <b>x</b>               | 4.82889  | 0.00048  | -0.00047 |
|         | <b>y</b>               | -0.00023 | 5.73311  | -0.28556 |
|         | <b>z</b>               | -0.00004 | -0.42668 | 5.85158  |
| Hf4     | <b>x</b>               | 4.82889  | 0.00048  | 0.00047  |

|  |          |          |         |         |
|--|----------|----------|---------|---------|
|  | <b>y</b> | -0.00023 | 5.73311 | 0.28556 |
|  | <b>z</b> | 0.00004  | 0.42668 | 5.85158 |

**Table S3.**  $Pca2_1$  of  $HfO_2$  ( $a = 5.234 \text{ \AA}$ ,  $b = 5.010 \text{ \AA}$ ,  $c = 5.443 \text{ \AA}$ ,  $P_r \sim 57.47 \mu C/cm^2$ )

| Element | Born Effective Charges |          |          |          |
|---------|------------------------|----------|----------|----------|
|         |                        | <b>x</b> | <b>y</b> | <b>z</b> |
| O1      | <b>x</b>               | -2.45928 | -0.95149 | 0.20905  |
|         | <b>y</b>               | -1.05101 | -2.80099 | -0.72711 |
|         | <b>z</b>               | 0.00463  | -0.73131 | -3.00603 |
| O2      | <b>x</b>               | -2.45773 | -0.94976 | -0.2092  |
|         | <b>y</b>               | -1.04805 | -2.79963 | 0.72702  |
|         | <b>z</b>               | -0.00427 | 0.73073  | -3.0088  |
| O3      | <b>x</b>               | -2.45928 | -0.95149 | -0.20905 |
|         | <b>y</b>               | -1.05101 | -2.80099 | 0.72711  |
|         | <b>z</b>               | -0.00463 | 0.73131  | -3.00603 |
| O4      | <b>x</b>               | -2.45773 | -0.94976 | 0.2092   |
|         | <b>y</b>               | -1.04805 | -2.79963 | -0.72702 |
|         | <b>z</b>               | 0.00427  | -0.73073 | -3.0088  |
| O5      | <b>x</b>               | -2.45928 | 0.95149  | 0.20905  |
|         | <b>y</b>               | 1.05101  | -2.80099 | 0.72711  |
|         | <b>z</b>               | 0.00463  | 0.73131  | -3.00603 |
| O6      | <b>x</b>               | -2.45773 | 0.94976  | -0.2092  |
|         | <b>y</b>               | 1.04805  | -2.79963 | -0.72702 |
|         | <b>z</b>               | -0.00427 | -0.73073 | -3.0088  |
| O7      | <b>x</b>               | -2.45928 | 0.95149  | -0.20905 |
|         | <b>y</b>               | 1.05101  | -2.80099 | -0.72711 |
|         | <b>z</b>               | -0.00463 | -0.73131 | -3.00603 |
| O8      | <b>x</b>               | -2.45773 | 0.94976  | 0.2092   |
|         | <b>y</b>               | 1.04805  | -2.79963 | 0.72702  |
|         | <b>z</b>               | 0.00427  | 0.73073  | -3.0088  |
| Hf1     | <b>x</b>               | 4.91702  | -0.00369 | -0.00424 |
|         | <b>y</b>               | 0.00205  | 5.60062  | 0.36147  |
|         | <b>z</b>               | -0.00118 | 0.56205  | 6.01484  |
| Hf2     | <b>x</b>               | 4.91702  | -0.00369 | 0.00424  |
|         | <b>y</b>               | 0.00205  | 5.60062  | -0.36147 |
|         | <b>z</b>               | 0.00118  | -0.56205 | 6.01484  |
| Hf3     | <b>x</b>               | 4.91702  | 0.00369  | -0.00424 |
|         | <b>y</b>               | -0.00205 | 5.60062  | -0.36147 |
|         | <b>z</b>               | -0.00118 | -0.56205 | 6.01484  |

|     |          |          |         |         |
|-----|----------|----------|---------|---------|
| Hf4 | <b>x</b> | 4.91702  | 0.00369 | 0.00424 |
|     | <b>y</b> | -0.00205 | 5.60062 | 0.36147 |
|     | <b>z</b> | 0.00118  | 0.56205 | 6.01484 |

**Table S4.**  $Pca2_1$  of  $HfO_2$  ( $a = 5.234 \text{ \AA}$ ,  $b = 5.010 \text{ \AA}$ ,  $c = 5.643 \text{ \AA}$ ,  $P_r \sim 67.01 \text{ \mu C/cm}^2$ )

| Element | Born Effective Charges |          |          |          |
|---------|------------------------|----------|----------|----------|
|         |                        | <b>x</b> | <b>y</b> | <b>z</b> |
| O1      | <b>x</b>               | -2.5147  | -0.99573 | 0.22472  |
|         | <b>y</b>               | -1.1253  | -2.71316 | -0.6145  |
|         | <b>z</b>               | 0.01955  | -0.62756 | -3.03957 |
| O2      | <b>x</b>               | -2.4797  | -0.9648  | -0.23043 |
|         | <b>y</b>               | -1.08165 | -2.70317 | 0.63889  |
|         | <b>z</b>               | -0.01941 | 0.65537  | -3.10112 |
| O3      | <b>x</b>               | -2.5147  | -0.99573 | -0.22472 |
|         | <b>y</b>               | -1.1253  | -2.71316 | 0.6145   |
|         | <b>z</b>               | -0.01955 | 0.62756  | -3.03957 |
| O4      | <b>x</b>               | -2.4797  | -0.9648  | 0.23043  |
|         | <b>y</b>               | -1.08165 | -2.70317 | -0.63889 |
|         | <b>z</b>               | 0.01941  | -0.65537 | -3.10112 |
| O5      | <b>x</b>               | -2.5147  | 0.99573  | 0.22472  |
|         | <b>y</b>               | 1.1253   | -2.71316 | 0.6145   |
|         | <b>z</b>               | 0.01955  | 0.62756  | -3.03957 |
| O6      | <b>x</b>               | -2.4797  | 0.9648   | -0.23043 |
|         | <b>y</b>               | 1.08165  | -2.70317 | -0.63889 |
|         | <b>z</b>               | -0.01941 | -0.65537 | -3.10112 |
| O7      | <b>x</b>               | -2.5147  | 0.99573  | -0.22472 |
|         | <b>y</b>               | 1.1253   | -2.71316 | -0.6145  |
|         | <b>z</b>               | -0.01955 | -0.62756 | -3.03957 |
| O8      | <b>x</b>               | -2.4797  | 0.9648   | 0.23043  |
|         | <b>y</b>               | 1.08165  | -2.70317 | 0.63889  |
|         | <b>z</b>               | 0.01941  | 0.65537  | -3.10112 |
| Hf1     | <b>x</b>               | 4.9944   | -0.01895 | -0.00607 |
|         | <b>y</b>               | 0.00065  | 5.41633  | 0.44407  |
|         | <b>z</b>               | -0.00664 | 0.70873  | 6.14069  |
| Hf2     | <b>x</b>               | 4.9944   | -0.01895 | 0.00607  |
|         | <b>y</b>               | 0.00065  | 5.41633  | -0.44407 |
|         | <b>z</b>               | 0.00664  | -0.70873 | 6.14069  |
| Hf3     | <b>x</b>               | 4.9944   | 0.01895  | -0.00607 |
|         | <b>y</b>               | -0.00065 | 5.41633  | -0.44407 |

|     |          |          |          |         |
|-----|----------|----------|----------|---------|
|     | <b>z</b> | -0.00664 | -0.70873 | 6.14069 |
| Hf4 | <b>x</b> | 4.9944   | 0.01895  | 0.00607 |
|     | <b>y</b> | -0.00065 | 5.41633  | 0.44407 |
|     | <b>z</b> | 0.00664  | 0.70873  | 6.14069 |

**Table S5.**  $Pca2_1$  of  $HfO_2$  ( $a = 5.334 \text{ \AA}$ ,  $b = 5.010 \text{ \AA}$ ,  $c = 5.043 \text{ \AA}$ ,  $P_r \sim 48.83 \text{ \mu C/cm}^2$ )

| Element | Born Effective Charges |          |          |          |
|---------|------------------------|----------|----------|----------|
|         |                        | <b>x</b> | <b>y</b> | <b>z</b> |
| O1      | <b>x</b>               | -2.39847 | -0.81321 | 0.18195  |
|         | <b>y</b>               | -0.86917 | -2.88469 | -0.82234 |
|         | <b>z</b>               | -0.00356 | -0.82383 | -2.81847 |
| O2      | <b>x</b>               | -2.39867 | -0.81321 | -0.18277 |
|         | <b>y</b>               | -0.869   | -2.88429 | 0.82319  |
|         | <b>z</b>               | 0.00319  | 0.82483  | -2.8186  |
| O3      | <b>x</b>               | -2.39847 | -0.81321 | -0.18195 |
|         | <b>y</b>               | -0.86917 | -2.88469 | 0.82234  |
|         | <b>z</b>               | 0.00356  | 0.82383  | -2.81847 |
| O4      | <b>x</b>               | -2.39867 | -0.81321 | 0.18277  |
|         | <b>y</b>               | -0.869   | -2.88429 | -0.82319 |
|         | <b>z</b>               | -0.00319 | -0.82483 | -2.8186  |
| O5      | <b>x</b>               | -2.39847 | 0.81321  | 0.18195  |
|         | <b>y</b>               | 0.86917  | -2.88469 | 0.82234  |
|         | <b>z</b>               | -0.00356 | 0.82383  | -2.81847 |
| O6      | <b>x</b>               | -2.39867 | 0.81321  | -0.18277 |
|         | <b>y</b>               | 0.869    | -2.88429 | -0.82319 |
|         | <b>z</b>               | 0.00319  | -0.82483 | -2.8186  |
| O7      | <b>x</b>               | -2.39847 | 0.81321  | -0.18195 |
|         | <b>y</b>               | 0.86917  | -2.88469 | -0.82234 |
|         | <b>z</b>               | 0.00356  | -0.82383 | -2.81847 |
| O8      | <b>x</b>               | -2.39867 | 0.81321  | 0.18277  |
|         | <b>y</b>               | 0.869    | -2.88429 | 0.82319  |
|         | <b>z</b>               | -0.00319 | 0.82483  | -2.8186  |
| Hf1     | <b>x</b>               | 4.79714  | 0.00085  | 0.00094  |
|         | <b>y</b>               | 0.00037  | 5.76898  | 0.23128  |
|         | <b>z</b>               | 0.00031  | 0.27844  | 5.63708  |
| Hf2     | <b>x</b>               | 4.79714  | 0.00085  | -0.00094 |
|         | <b>y</b>               | 0.00037  | 5.76898  | -0.23128 |
|         | <b>z</b>               | -0.00031 | -0.27844 | 5.63708  |
| Hf3     | <b>x</b>               | 4.79714  | -0.00085 | 0.00094  |

|     |          |          |          |          |
|-----|----------|----------|----------|----------|
|     | <b>y</b> | -0.00037 | 5.76898  | -0.23128 |
|     | <b>z</b> | 0.00031  | -0.27844 | 5.63708  |
| Hf4 | <b>x</b> | 4.79714  | -0.00085 | -0.00094 |
|     | <b>y</b> | -0.00037 | 5.76898  | 0.23128  |
|     | <b>z</b> | -0.00031 | 0.27844  | 5.63708  |

**Table S6.**  $Pca2_1$  of  $HfO_2$  ( $a = 5.434 \text{ \AA}$ ,  $b = 5.010 \text{ \AA}$ ,  $c = 5.043 \text{ \AA}$ ,  $P_r \sim 47.93 \text{ \mu C/cm}^2$ )

| Element | Born Effective Charges |          |          |          |
|---------|------------------------|----------|----------|----------|
|         |                        | <b>x</b> | <b>y</b> | <b>z</b> |
| O1      | <b>x</b>               | -2.43275 | -0.88597 | 0.18613  |
|         | <b>y</b>               | -0.93094 | -2.87779 | -0.82657 |
|         | <b>z</b>               | -0.0152  | -0.83362 | -2.80523 |
| O2      | <b>x</b>               | -2.43062 | -0.87752 | -0.18354 |
|         | <b>y</b>               | -0.91922 | -2.87416 | 0.8292   |
|         | <b>z</b>               | 0.01576  | 0.8365   | -2.81087 |
| O3      | <b>x</b>               | -2.43275 | -0.88597 | -0.18613 |
|         | <b>y</b>               | -0.93094 | -2.87779 | 0.82657  |
|         | <b>z</b>               | 0.0152   | 0.83362  | -2.80523 |
| O4      | <b>x</b>               | -2.43062 | -0.87752 | 0.18354  |
|         | <b>y</b>               | -0.91922 | -2.87416 | -0.8292  |
|         | <b>z</b>               | -0.01576 | -0.8365  | -2.81087 |
| O5      | <b>x</b>               | -2.43275 | 0.88597  | 0.18613  |
|         | <b>y</b>               | 0.93094  | -2.87779 | 0.82657  |
|         | <b>z</b>               | -0.0152  | 0.83362  | -2.80523 |
| O6      | <b>x</b>               | -2.43062 | 0.87752  | -0.18354 |
|         | <b>y</b>               | 0.91922  | -2.87416 | -0.8292  |
|         | <b>z</b>               | 0.01576  | -0.8365  | -2.81087 |
| O7      | <b>x</b>               | -2.43275 | 0.88597  | -0.18613 |
|         | <b>y</b>               | 0.93094  | -2.87779 | -0.82657 |
|         | <b>z</b>               | 0.0152   | -0.83362 | -2.80523 |
| O8      | <b>x</b>               | -2.43062 | 0.87752  | 0.18354  |
|         | <b>y</b>               | 0.91922  | -2.87416 | 0.8292   |
|         | <b>z</b>               | -0.01576 | 0.8365   | -2.81087 |
| Hf1     | <b>x</b>               | 4.86338  | -0.0067  | -0.00979 |
|         | <b>y</b>               | 0.00399  | 5.75195  | 0.22916  |
|         | <b>z</b>               | -0.00436 | 0.26061  | 5.6161   |
| Hf2     | <b>x</b>               | 4.86338  | -0.0067  | 0.00979  |
|         | <b>y</b>               | 0.00399  | 5.75195  | -0.22916 |
|         | <b>z</b>               | 0.00436  | -0.26061 | 5.6161   |

|     |          |          |          |          |
|-----|----------|----------|----------|----------|
| Hf3 | <b>x</b> | 4.86338  | 0.0067   | -0.00979 |
|     | <b>y</b> | -0.00399 | 5.75195  | -0.22916 |
|     | <b>z</b> | -0.00436 | -0.26061 | 5.6161   |
| Hf4 | <b>x</b> | 4.86338  | 0.0067   | 0.00979  |
|     | <b>y</b> | -0.00399 | 5.75195  | 0.22916  |
|     | <b>z</b> | 0.00436  | 0.26061  | 5.6161   |

**Table S7.**  $Pca2_1$  of  $HfO_2$  ( $a = 5.534 \text{ \AA}$ ,  $b = 5.010 \text{ \AA}$ ,  $c = 5.043 \text{ \AA}$ ,  $P_r \sim 47.10 \mu C/cm^2$ )

| Element | Born Effective Charges |          |          |          |
|---------|------------------------|----------|----------|----------|
|         |                        | <b>x</b> | <b>y</b> | <b>z</b> |
| O1      | <b>x</b>               | -2.45396 | -0.916   | 0.17932  |
|         | <b>y</b>               | -0.9476  | -2.85824 | -0.83401 |
|         | <b>z</b>               | -0.02481 | -0.84622 | -2.79825 |
| O2      | <b>x</b>               | -2.45614 | -0.91736 | -0.18003 |
|         | <b>y</b>               | -0.94849 | -2.85817 | 0.83188  |
|         | <b>z</b>               | 0.02445  | 0.84461  | -2.7983  |
| O3      | <b>x</b>               | -2.45396 | -0.916   | -0.17932 |
|         | <b>y</b>               | -0.9476  | -2.85824 | 0.83401  |
|         | <b>z</b>               | 0.02481  | 0.84622  | -2.79825 |
| O4      | <b>x</b>               | -2.45614 | -0.91736 | 0.18003  |
|         | <b>y</b>               | -0.94849 | -2.85817 | -0.83188 |
|         | <b>z</b>               | -0.02445 | -0.84461 | -2.7983  |
| O5      | <b>x</b>               | -2.45396 | 0.916    | 0.17932  |
|         | <b>y</b>               | 0.9476   | -2.85824 | 0.83401  |
|         | <b>z</b>               | -0.02481 | 0.84622  | -2.79825 |
| O6      | <b>x</b>               | -2.45614 | 0.91736  | -0.18003 |
|         | <b>y</b>               | 0.94849  | -2.85817 | -0.83188 |
|         | <b>z</b>               | 0.02445  | -0.84461 | -2.7983  |
| O7      | <b>x</b>               | -2.45396 | 0.916    | -0.17932 |
|         | <b>y</b>               | 0.9476   | -2.85824 | -0.83401 |
|         | <b>z</b>               | 0.02481  | -0.84622 | -2.79825 |
| O8      | <b>x</b>               | -2.45614 | 0.91736  | 0.18003  |
|         | <b>y</b>               | 0.94849  | -2.85817 | 0.83188  |
|         | <b>z</b>               | -0.02445 | 0.84461  | -2.7983  |
| Hf1     | <b>x</b>               | 4.91009  | 0.00062  | 0.00109  |
|         | <b>y</b>               | 0.00054  | 5.71641  | 0.21424  |
|         | <b>z</b>               | 0.00051  | 0.23374  | 5.59654  |
| Hf2     | <b>x</b>               | 4.91009  | 0.00062  | -0.00109 |
|         | <b>y</b>               | 0.00054  | 5.71641  | -0.21424 |

|     |          |          |          |          |
|-----|----------|----------|----------|----------|
|     | <b>z</b> | -0.00051 | -0.23374 | 5.59654  |
| Hf3 | <b>x</b> | 4.91009  | -0.00062 | 0.00109  |
|     | <b>y</b> | -0.00054 | 5.71641  | -0.21424 |
|     | <b>z</b> | 0.00051  | -0.23374 | 5.59654  |
| Hf4 | <b>x</b> | 4.91009  | -0.00062 | -0.00109 |
|     | <b>y</b> | -0.00054 | 5.71641  | 0.21424  |
|     | <b>z</b> | -0.00051 | 0.23374  | 5.59654  |

**Table S8.**  $Pca_{2_1}$  of  $HfO_2$  ( $a = 5.634 \text{ \AA}$ ,  $b = 5.010 \text{ \AA}$ ,  $c = 5.043 \text{ \AA}$ ,  $P_r \sim 47.09 \text{ } \mu\text{C}/\text{cm}^2$ )

| Element | Born Effective Charges |          |          |          |
|---------|------------------------|----------|----------|----------|
|         |                        | <b>x</b> | <b>Y</b> | <b>z</b> |
| O1      | <b>x</b>               | -2.4646  | -0.93657 | 0.17107  |
|         | <b>y</b>               | -0.95042 | -2.84157 | -0.84386 |
|         | <b>z</b>               | -0.0328  | -0.8631  | -2.78826 |
| O2      | <b>x</b>               | -2.46668 | -0.94097 | -0.16821 |
|         | <b>y</b>               | -0.95899 | -2.84409 | 0.84358  |
|         | <b>z</b>               | 0.03652  | 0.86156  | -2.78417 |
| O3      | <b>x</b>               | -2.4646  | -0.93657 | -0.17107 |
|         | <b>y</b>               | -0.95042 | -2.84157 | 0.84386  |
|         | <b>z</b>               | 0.0328   | 0.8631   | -2.78826 |
| O4      | <b>x</b>               | -2.46668 | -0.94097 | 0.16821  |
|         | <b>y</b>               | -0.95899 | -2.84409 | -0.84358 |
|         | <b>z</b>               | -0.03652 | -0.86156 | -2.78417 |
| O5      | <b>x</b>               | -2.4646  | 0.93657  | 0.17107  |
|         | <b>y</b>               | 0.95042  | -2.84157 | 0.84386  |
|         | <b>z</b>               | -0.0328  | 0.8631   | -2.78826 |
| O6      | <b>x</b>               | -2.46668 | 0.94097  | -0.16821 |
|         | <b>y</b>               | 0.95899  | -2.84409 | -0.84358 |
|         | <b>z</b>               | 0.03652  | -0.86156 | -2.78417 |
| O7      | <b>x</b>               | -2.4646  | 0.93657  | -0.17107 |
|         | <b>y</b>               | 0.95042  | -2.84157 | -0.84386 |
|         | <b>z</b>               | 0.0328   | -0.8631  | -2.78826 |
| O8      | <b>x</b>               | -2.46668 | 0.94097  | 0.16821  |
|         | <b>y</b>               | 0.95899  | -2.84409 | 0.84358  |
|         | <b>z</b>               | -0.03652 | 0.86156  | -2.78417 |
| Hf1     | <b>x</b>               | 4.93129  | 0.00131  | 0.00335  |
|         | <b>y</b>               | -0.00573 | 5.68566  | 0.19757  |
|         | <b>z</b>               | 0.00237  | 0.19964  | 5.57243  |
| Hf2     | <b>x</b>               | 4.93129  | 0.00131  | -0.00335 |
|         | <b>y</b>               | -0.00573 | 5.68566  | -0.19757 |



|     |          |          |          |          |
|-----|----------|----------|----------|----------|
|     | <b>z</b> | -0.00237 | -0.19964 | 5.57243  |
| Hf3 | <b>x</b> | 4.93129  | -0.00131 | 0.00335  |
|     | <b>y</b> | 0.00573  | 5.68566  | -0.19757 |
|     | <b>z</b> | 0.00237  | -0.19964 | 5.57243  |
| Hf4 | <b>x</b> | 4.93129  | -0.00131 | -0.00335 |
|     | <b>y</b> | 0.00573  | 5.68566  | 0.19757  |
|     | <b>z</b> | -0.00237 | 0.19964  | 5.57243  |

**Table S9.**  $Pca2_1$  of  $HfO_2$  ( $a = 5.834 \text{ \AA}$ ,  $b = 5.010 \text{ \AA}$ ,  $c = 5.043 \text{ \AA}$ ,  $P_r \sim 45.27 \mu\text{C}/\text{cm}^2$ )

| Element | Born Effective Charges |          |          |          |
|---------|------------------------|----------|----------|----------|
|         |                        | <b>x</b> | <b>Y</b> | <b>z</b> |
| O1      | <b>x</b>               | -2.45931 | -0.97383 | 0.14438  |
|         | <b>y</b>               | -0.95399 | -2.81628 | -0.87227 |
|         | <b>z</b>               | -0.05706 | -0.90549 | -2.76457 |
| O2      | <b>x</b>               | -2.45139 | -0.96924 | -0.14016 |
|         | <b>y</b>               | -0.9527  | -2.81873 | 0.88066  |
|         | <b>z</b>               | 0.06007  | 0.91114  | -2.76827 |
| O3      | <b>x</b>               | -2.45931 | -0.97383 | -0.14438 |
|         | <b>y</b>               | -0.95399 | -2.81628 | 0.87227  |
|         | <b>z</b>               | 0.05706  | 0.90549  | -2.76457 |
| O4      | <b>x</b>               | -2.45139 | -0.96924 | 0.14016  |
|         | <b>y</b>               | -0.9527  | -2.81873 | -0.88066 |
|         | <b>z</b>               | -0.06007 | -0.91114 | -2.76827 |
| O5      | <b>x</b>               | -2.45931 | 0.97383  | 0.14438  |
|         | <b>y</b>               | 0.95399  | -2.81628 | 0.87227  |
|         | <b>z</b>               | -0.05706 | 0.90549  | -2.76457 |
| O6      | <b>x</b>               | -2.45139 | 0.96924  | -0.14016 |
|         | <b>y</b>               | 0.9527   | -2.81873 | -0.88066 |
|         | <b>z</b>               | 0.06007  | -0.91114 | -2.76827 |
| O7      | <b>x</b>               | -2.45931 | 0.97383  | -0.14438 |
|         | <b>y</b>               | 0.95399  | -2.81628 | -0.87227 |
|         | <b>z</b>               | 0.05706  | -0.90549 | -2.76457 |
| O8      | <b>x</b>               | -2.45139 | 0.96924  | 0.14016  |
|         | <b>y</b>               | 0.9527   | -2.81873 | 0.88066  |
|         | <b>z</b>               | -0.06007 | 0.91114  | -2.76827 |
| Hf1     | <b>x</b>               | 4.9107   | -0.00254 | -0.00385 |
|         | <b>y</b>               | -0.00445 | 5.63502  | 0.1668   |
|         | <b>z</b>               | -0.00154 | 0.12219  | 5.53284  |
| Hf2     | <b>x</b>               | 4.9107   | -0.00254 | 0.00385  |
|         | <b>y</b>               | -0.00445 | 5.63502  | -0.1668  |
|         | <b>z</b>               | 0.00154  | -0.12219 | 5.53284  |

|     |          |          |          |          |
|-----|----------|----------|----------|----------|
| Hf3 | <b>x</b> | 4.9107   | 0.00254  | -0.00385 |
|     | <b>y</b> | 0.00445  | 5.63502  | -0.1668  |
|     | <b>z</b> | -0.00154 | -0.12219 | 5.53284  |
| Hf4 | <b>x</b> | 4.9107   | 0.00254  | 0.00385  |
|     | <b>y</b> | 0.00445  | 5.63502  | 0.1668   |
|     | <b>z</b> | 0.00154  | 0.12219  | 5.53284  |

**Table S10.**  $Pca2_1$  of  $HfO_2$  ( $a = 5.234 \text{ \AA}$ ,  $b = 5.110 \text{ \AA}$ ,  $c = 5.043 \text{ \AA}$ ,  $P_r \sim 48.25 \mu C/cm^2$ )

| Element | Born Effective Charges |          |          |          |
|---------|------------------------|----------|----------|----------|
|         |                        | <b>x</b> | <b>Y</b> | <b>z</b> |
| O1      | <b>x</b>               | -2.34869 | -0.75865 | 0.19839  |
|         | <b>y</b>               | -0.83928 | -2.9426  | -0.81367 |
|         | <b>z</b>               | 0.0094   | -0.8111  | -2.81128 |
| O2      | <b>x</b>               | -2.3476  | -0.75978 | -0.19985 |
|         | <b>y</b>               | -0.84091 | -2.94359 | 0.8145   |
|         | <b>z</b>               | -0.01052 | 0.81165  | -2.81025 |
| O3      | <b>x</b>               | -2.34869 | -0.75865 | -0.19839 |
|         | <b>y</b>               | -0.83928 | -2.9426  | 0.81367  |
|         | <b>z</b>               | -0.0094  | 0.8111   | -2.81128 |
| O4      | <b>x</b>               | -2.3476  | -0.75978 | 0.19985  |
|         | <b>y</b>               | -0.84091 | -2.94359 | -0.8145  |
|         | <b>z</b>               | 0.01052  | -0.81165 | -2.81025 |
| O5      | <b>x</b>               | -2.34869 | 0.75865  | 0.19839  |
|         | <b>y</b>               | 0.83928  | -2.9426  | 0.81367  |
|         | <b>z</b>               | 0.0094   | 0.8111   | -2.81128 |
| O6      | <b>x</b>               | -2.3476  | 0.75978  | -0.19985 |
|         | <b>y</b>               | 0.84091  | -2.94359 | -0.8145  |
|         | <b>z</b>               | -0.01052 | -0.81165 | -2.81025 |
| O7      | <b>x</b>               | -2.34869 | 0.75865  | -0.19839 |
|         | <b>y</b>               | 0.83928  | -2.9426  | -0.81367 |
|         | <b>z</b>               | -0.0094  | -0.8111  | -2.81128 |
| O8      | <b>x</b>               | -2.3476  | 0.75978  | 0.19985  |
|         | <b>y</b>               | 0.84091  | -2.94359 | 0.8145   |
|         | <b>z</b>               | 0.01052  | 0.81165  | -2.81025 |
| Hf1     | <b>x</b>               | 4.69629  | 0.00146  | 0.00155  |
|         | <b>y</b>               | -0.00004 | 5.88619  | 0.25652  |
|         | <b>z</b>               | 0.00062  | 0.26763  | 5.62153  |
| Hf2     | <b>x</b>               | 4.69629  | 0.00146  | -0.00155 |
|         | <b>y</b>               | -0.00004 | 5.88619  | -0.25652 |
|         | <b>z</b>               | -0.00062 | -0.26763 | 5.62153  |
| Hf3     | <b>x</b>               | 4.69629  | -0.00146 | 0.00155  |

|     |          |          |          |          |
|-----|----------|----------|----------|----------|
|     | <b>y</b> | 0.00004  | 5.88619  | -0.25652 |
|     | <b>z</b> | 0.00062  | -0.26763 | 5.62153  |
| Hf4 | <b>x</b> | 4.69629  | -0.00146 | -0.00155 |
|     | <b>y</b> | 0.00004  | 5.88619  | 0.25652  |
|     | <b>z</b> | -0.00062 | 0.26763  | 5.62153  |

**Table S11.**  $Pca2_1$  of  $HfO_2$  ( $a = 5.234 \text{ \AA}$ ,  $b = 5.210 \text{ \AA}$ ,  $c = 5.043 \text{ \AA}$ ,  $P_r \sim 47.93 \text{ \mu C/cm}^2$ )

| Element | Born Effective Charges |          |          |          |
|---------|------------------------|----------|----------|----------|
|         |                        | <b>x</b> | <b>y</b> | <b>z</b> |
| O1      | <b>x</b>               | -2.34759 | -0.79536 | 0.23357  |
|         | <b>y</b>               | -0.89811 | -2.99327 | -0.80672 |
|         | <b>z</b>               | 0.01469  | -0.80212 | -2.79922 |
| O2      | <b>x</b>               | -2.34793 | -0.79437 | -0.23216 |
|         | <b>y</b>               | -0.89661 | -2.99218 | 0.80623  |
|         | <b>z</b>               | -0.01358 | 0.80173  | -2.7992  |
| O3      | <b>x</b>               | -2.34759 | -0.79536 | -0.23357 |
|         | <b>y</b>               | -0.89811 | -2.99327 | 0.80672  |
|         | <b>z</b>               | -0.01469 | 0.80212  | -2.79922 |
| O4      | <b>x</b>               | -2.34793 | -0.79437 | 0.23216  |
|         | <b>y</b>               | -0.89661 | -2.99218 | -0.80623 |
|         | <b>z</b>               | 0.01358  | -0.80173 | -2.7992  |
| O5      | <b>x</b>               | -2.34759 | 0.79536  | 0.23357  |
|         | <b>y</b>               | 0.89811  | -2.99327 | 0.80672  |
|         | <b>z</b>               | 0.01469  | 0.80212  | -2.79922 |
| O6      | <b>x</b>               | -2.34793 | 0.79437  | -0.23216 |
|         | <b>y</b>               | 0.89661  | -2.99218 | -0.80623 |
|         | <b>z</b>               | -0.01358 | -0.80173 | -2.7992  |
| O7      | <b>x</b>               | -2.34759 | 0.79536  | -0.23357 |
|         | <b>y</b>               | 0.89811  | -2.99327 | -0.80672 |
|         | <b>z</b>               | -0.01469 | -0.80212 | -2.79922 |
| O8      | <b>x</b>               | -2.34793 | 0.79437  | 0.23216  |
|         | <b>y</b>               | 0.89661  | -2.99218 | 0.80623  |
|         | <b>z</b>               | 0.01358  | 0.80173  | -2.7992  |
| Hf1     | <b>x</b>               | 4.69553  | -0.00149 | -0.00181 |
|         | <b>y</b>               | 0.0001   | 5.98545  | 0.28112  |
|         | <b>z</b>               | -0.0007  | 0.25179  | 5.59842  |
| Hf2     | <b>x</b>               | 4.69553  | -0.00149 | 0.00181  |
|         | <b>y</b>               | 0.0001   | 5.98545  | -0.28112 |
|         | <b>z</b>               | 0.0007   | -0.25179 | 5.59842  |

|     |          |         |          |          |
|-----|----------|---------|----------|----------|
| Hf3 | <b>x</b> | 4.69553 | 0.00149  | -0.00181 |
|     | <b>y</b> | -0.0001 | 5.98545  | -0.28112 |
|     | <b>z</b> | -0.0007 | -0.25179 | 5.59842  |
| Hf4 | <b>x</b> | 4.69553 | 0.00149  | 0.00181  |
|     | <b>y</b> | -0.0001 | 5.98545  | 0.28112  |
|     | <b>z</b> | 0.0007  | 0.25179  | 5.59842  |

**Table S12.**  $Pca2_1$  of  $HfO_2$  ( $a = 5.234 \text{ \AA}$ ,  $b = 5.310 \text{ \AA}$ ,  $c = 5.043 \text{ \AA}$ ,  $P_r \sim 47.14 \text{ \mu C/cm}^2$ )

| Element | Born Effective Charges |          |          |          |
|---------|------------------------|----------|----------|----------|
|         |                        | <b>x</b> | <b>y</b> | <b>z</b> |
| O1      | <b>x</b>               | -2.35443 | -0.82291 | 0.26826  |
|         | <b>y</b>               | -0.94939 | -3.02865 | -0.79043 |
|         | <b>z</b>               | 0.01929  | -0.7828  | -2.79531 |
| O2      | <b>x</b>               | -2.3497  | -0.82339 | -0.27205 |
|         | <b>y</b>               | -0.95012 | -3.03008 | 0.79067  |
|         | <b>z</b>               | -0.02283 | 0.78326  | -2.7945  |
| O3      | <b>x</b>               | -2.35443 | -0.82291 | -0.26826 |
|         | <b>y</b>               | -0.94939 | -3.02865 | 0.79043  |
|         | <b>z</b>               | -0.01929 | 0.7828   | -2.79531 |
| O4      | <b>x</b>               | -2.3497  | -0.82339 | 0.27205  |
|         | <b>y</b>               | -0.95012 | -3.03008 | -0.79067 |
|         | <b>z</b>               | 0.02283  | -0.78326 | -2.7945  |
| O5      | <b>x</b>               | -2.35443 | 0.82291  | 0.26826  |
|         | <b>y</b>               | 0.94939  | -3.02865 | 0.79043  |
|         | <b>z</b>               | 0.01929  | 0.7828   | -2.79531 |
| O6      | <b>x</b>               | -2.3497  | 0.82339  | -0.27205 |
|         | <b>y</b>               | 0.95012  | -3.03008 | -0.79067 |
|         | <b>z</b>               | -0.02283 | -0.78326 | -2.7945  |
| O7      | <b>x</b>               | -2.35443 | 0.82291  | -0.26826 |
|         | <b>y</b>               | 0.94939  | -3.02865 | -0.79043 |
|         | <b>z</b>               | -0.01929 | -0.7828  | -2.79531 |
| O8      | <b>x</b>               | -2.3497  | 0.82339  | 0.27205  |
|         | <b>y</b>               | 0.95012  | -3.03008 | 0.79067  |
|         | <b>z</b>               | 0.02283  | 0.78326  | -2.7945  |
| Hf1     | <b>x</b>               | 4.70413  | 0.00437  | 0.00524  |
|         | <b>y</b>               | 0.00085  | 6.05873  | 0.30483  |
|         | <b>z</b>               | 0.00152  | 0.23288  | 5.58981  |
| Hf2     | <b>x</b>               | 4.70413  | 0.00437  | -0.00524 |
|         | <b>y</b>               | 0.00085  | 6.05873  | -0.30483 |

|     |          |          |          |          |
|-----|----------|----------|----------|----------|
|     | <b>z</b> | -0.00152 | -0.23288 | 5.58981  |
| Hf3 | <b>x</b> | 4.70413  | -0.00437 | 0.00524  |
|     | <b>y</b> | -0.00085 | 6.05873  | -0.30483 |
|     | <b>z</b> | 0.00152  | -0.23288 | 5.58981  |
| Hf4 | <b>x</b> | 4.70413  | -0.00437 | -0.00524 |
|     | <b>y</b> | -0.00085 | 6.05873  | 0.30483  |
|     | <b>z</b> | -0.00152 | 0.23288  | 5.58981  |

**Table S13.**  $Pca2_1$  of  $HfO_2$  ( $a = 5.234 \text{ \AA}$ ,  $b = 5.410 \text{ \AA}$ ,  $c = 5.043 \text{ \AA}$ ,  $P_r \sim 46.60 \text{ \mu C/cm}^2$ )

| Element | Born Effective Charges |          |          |          |
|---------|------------------------|----------|----------|----------|
|         |                        | <b>x</b> | <b>y</b> | <b>z</b> |
| O1      | <b>x</b>               | -2.35779 | -0.83804 | 0.31262  |
|         | <b>y</b>               | -0.99162 | -3.04803 | -0.76701 |
|         | <b>z</b>               | 0.03273  | -0.75563 | -2.79922 |
| O2      | <b>x</b>               | -2.36151 | -0.84028 | -0.3107  |
|         | <b>y</b>               | -0.9941  | -3.04682 | 0.7618   |
|         | <b>z</b>               | -0.03086 | 0.75054  | -2.79464 |
| O3      | <b>x</b>               | -2.35779 | -0.83804 | -0.31262 |
|         | <b>y</b>               | -0.99162 | -3.04803 | 0.76701  |
|         | <b>z</b>               | -0.03273 | 0.75563  | -2.79922 |
| O4      | <b>x</b>               | -2.36151 | -0.84028 | 0.3107   |
|         | <b>y</b>               | -0.9941  | -3.04682 | -0.7618  |
|         | <b>z</b>               | 0.03086  | -0.75054 | -2.79464 |
| O5      | <b>x</b>               | -2.35779 | 0.83804  | 0.31262  |
|         | <b>y</b>               | 0.99162  | -3.04803 | 0.76701  |
|         | <b>z</b>               | 0.03273  | 0.75563  | -2.79922 |
| O6      | <b>x</b>               | -2.36151 | 0.84028  | -0.3107  |
|         | <b>y</b>               | 0.9941   | -3.04682 | -0.7618  |
|         | <b>z</b>               | -0.03086 | -0.75054 | -2.79464 |
| O7      | <b>x</b>               | -2.35779 | 0.83804  | -0.31262 |
|         | <b>y</b>               | 0.99162  | -3.04803 | -0.76701 |
|         | <b>z</b>               | -0.03273 | -0.75563 | -2.79922 |
| O8      | <b>x</b>               | -2.36151 | 0.84028  | 0.3107   |
|         | <b>y</b>               | 0.9941   | -3.04682 | 0.7618   |
|         | <b>z</b>               | 0.03086  | 0.75054  | -2.79464 |
| Hf1     | <b>x</b>               | 4.7193   | -0.00018 | -0.00026 |
|         | <b>y</b>               | 0.0001   | 6.09485  | 0.32346  |
|         | <b>z</b>               | 0.00053  | 0.21582  | 5.59386  |
| Hf2     | <b>x</b>               | 4.7193   | -0.00018 | 0.00026  |

|     |          |          |          |          |
|-----|----------|----------|----------|----------|
|     | <b>y</b> | 0.0001   | 6.09485  | -0.32346 |
|     | <b>z</b> | -0.00053 | -0.21582 | 5.59386  |
| Hf3 | <b>x</b> | 4.7193   | 0.00018  | -0.00026 |
|     | <b>y</b> | -0.0001  | 6.09485  | -0.32346 |
|     | <b>z</b> | 0.00053  | -0.21582 | 5.59386  |
| Hf4 | <b>x</b> | 4.7193   | 0.00018  | 0.00026  |
|     | <b>y</b> | -0.0001  | 6.09485  | 0.32346  |
|     | <b>z</b> | -0.00053 | 0.21582  | 5.59386  |

**Table S14.**  $Pca2_1$  of  $HfO_2$  ( $a = 5.234 \text{ \AA}$ ,  $b = 5.510 \text{ \AA}$ ,  $c = 5.043 \text{ \AA}$ ,  $P_r \sim 47.14 \text{ \mu C/cm}^2$ )

| Element | Born Effective Charges |          |          |          |
|---------|------------------------|----------|----------|----------|
|         |                        | <b>x</b> | <b>y</b> | <b>z</b> |
| O1      | <b>x</b>               | -2.37511 | -0.85604 | 0.36303  |
|         | <b>y</b>               | -1.0407  | -3.03649 | -0.72122 |
|         | <b>z</b>               | 0.04624  | -0.70323 | -2.8091  |
| O2      | <b>x</b>               | -2.37419 | -0.85573 | -0.36746 |
|         | <b>y</b>               | -1.03712 | -3.03619 | 0.71776  |
|         | <b>z</b>               | -0.05014 | 0.70181  | -2.81131 |
| O3      | <b>x</b>               | -2.37511 | -0.85604 | -0.36303 |
|         | <b>y</b>               | -1.0407  | -3.03649 | 0.72122  |
|         | <b>z</b>               | -0.04624 | 0.70323  | -2.8091  |
| O4      | <b>x</b>               | -2.37419 | -0.85573 | 0.36746  |
|         | <b>y</b>               | -1.03712 | -3.03619 | -0.71776 |
|         | <b>z</b>               | 0.05014  | -0.70181 | -2.81131 |
| O5      | <b>x</b>               | -2.37511 | 0.85604  | 0.36303  |
|         | <b>y</b>               | 1.0407   | -3.03649 | 0.72122  |
|         | <b>z</b>               | 0.04624  | 0.70323  | -2.8091  |
| O6      | <b>x</b>               | -2.37419 | 0.85573  | -0.36746 |
|         | <b>y</b>               | 1.03712  | -3.03619 | -0.71776 |
|         | <b>z</b>               | -0.05014 | -0.70181 | -2.81131 |
| O7      | <b>x</b>               | -2.37511 | 0.85604  | -0.36303 |
|         | <b>y</b>               | 1.0407   | -3.03649 | -0.72122 |
|         | <b>z</b>               | -0.04624 | -0.70323 | -2.8091  |
| O8      | <b>x</b>               | -2.37419 | 0.85573  | 0.36746  |
|         | <b>y</b>               | 1.03712  | -3.03619 | 0.71776  |
|         | <b>z</b>               | 0.05014  | 0.70181  | -2.81131 |
| Hf1     | <b>x</b>               | 4.7493   | 0.00232  | 0.00298  |
|         | <b>y</b>               | 0.00431  | 6.07267  | 0.34095  |
|         | <b>z</b>               | 0.00041  | 0.21164  | 5.62042  |

|     |          |          |          |          |
|-----|----------|----------|----------|----------|
| Hf2 | <b>x</b> | 4.7493   | 0.00232  | -0.00298 |
|     | <b>y</b> | 0.00431  | 6.07267  | -0.34095 |
|     | <b>z</b> | -0.00041 | -0.21164 | 5.62042  |
| Hf3 | <b>x</b> | 4.7493   | -0.00232 | 0.00298  |
|     | <b>y</b> | -0.00431 | 6.07267  | -0.34095 |
|     | <b>z</b> | 0.00041  | -0.21164 | 5.62042  |
| Hf4 | <b>x</b> | 4.7493   | -0.00232 | -0.00298 |
|     | <b>y</b> | -0.00431 | 6.07267  | 0.34095  |
|     | <b>z</b> | -0.00041 | 0.21164  | 5.62042  |

**Table S15.**  $Pca2_1$  of  $HfO_2$  ( $a = 5.234 \text{ \AA}$ ,  $b = 5.610 \text{ \AA}$ ,  $c = 5.043 \text{ \AA}$ ,  $P_r \sim 45.58 \mu C/cm^2$ )

| Element | Born Effective Charges |          |          |          |
|---------|------------------------|----------|----------|----------|
|         |                        | <b>x</b> | <b>y</b> | <b>z</b> |
| O1      | <b>x</b>               | -2.38186 | -0.86693 | 0.4262   |
|         | <b>y</b>               | -1.07334 | -2.99538 | -0.66141 |
|         | <b>z</b>               | 0.06948  | -0.63653 | -2.83173 |
| O2      | <b>x</b>               | -2.38185 | -0.8669  | -0.42547 |
|         | <b>y</b>               | -1.07368 | -2.99532 | 0.66195  |
|         | <b>z</b>               | -0.06876 | 0.63703  | -2.83115 |
| O3      | <b>x</b>               | -2.38186 | -0.86693 | -0.4262  |
|         | <b>y</b>               | -1.07334 | -2.99538 | 0.66141  |
|         | <b>z</b>               | -0.06948 | 0.63653  | -2.83173 |
| O4      | <b>x</b>               | -2.38185 | -0.8669  | 0.42547  |
|         | <b>y</b>               | -1.07368 | -2.99532 | -0.66195 |
|         | <b>z</b>               | 0.06876  | -0.63703 | -2.83115 |
| O5      | <b>x</b>               | -2.38186 | 0.86693  | 0.4262   |
|         | <b>y</b>               | 1.07334  | -2.99538 | 0.66141  |
|         | <b>z</b>               | 0.06948  | 0.63653  | -2.83173 |
| O6      | <b>x</b>               | -2.38185 | 0.8669   | -0.42547 |
|         | <b>y</b>               | 1.07368  | -2.99532 | -0.66195 |
|         | <b>z</b>               | -0.06876 | -0.63703 | -2.83115 |
| O7      | <b>x</b>               | -2.38186 | 0.86693  | -0.4262  |
|         | <b>y</b>               | 1.07334  | -2.99538 | -0.66141 |
|         | <b>z</b>               | -0.06948 | -0.63653 | -2.83173 |
| O8      | <b>x</b>               | -2.38185 | 0.8669   | 0.42547  |
|         | <b>y</b>               | 1.07368  | -2.99532 | 0.66195  |
|         | <b>z</b>               | 0.06876  | 0.63703  | -2.83115 |
| Hf1     | <b>x</b>               | 4.76372  | -0.00012 | -0.00016 |
|         | <b>y</b>               | -0.00048 | 5.9907   | 0.3517   |

|     |          |          |          |          |
|-----|----------|----------|----------|----------|
|     | <b>z</b> | 0.00001  | 0.22022  | 5.66287  |
| Hf2 | <b>x</b> | 4.76372  | -0.00012 | 0.00016  |
|     | <b>y</b> | -0.00048 | 5.9907   | -0.3517  |
|     | <b>z</b> | -0.00001 | -0.22022 | 5.66287  |
| Hf3 | <b>x</b> | 4.76372  | 0.00012  | -0.00016 |
|     | <b>y</b> | 0.00048  | 5.9907   | -0.3517  |
|     | <b>z</b> | 0.00001  | -0.22022 | 5.66287  |
| Hf4 | <b>x</b> | 4.76372  | 0.00012  | 0.00016  |
|     | <b>y</b> | 0.00048  | 5.9907   | 0.3517   |
|     | <b>z</b> | -0.00001 | 0.22022  | 5.66287  |

**Table S16.**  $Pca2_1$  of  $HfO_2$  ( $a = 5.2106 \text{ \AA}$ ,  $b = 5.0074 \text{ \AA}$ ,  $c = 5.276 \text{ \AA}$ ,  $P_r \sim 60.76 \text{ \mu C/cm}^2$ )

| Element | Born Effective Charges |          |          |          |
|---------|------------------------|----------|----------|----------|
|         |                        | <b>x</b> | <b>y</b> | <b>z</b> |
| O1      | <b>x</b>               | -2.41491 | -0.87936 | 0.2009   |
|         | <b>y</b>               | -0.96718 | -2.86333 | -0.78509 |
|         | <b>z</b>               | 0.00093  | -0.77977 | -2.94586 |
| O2      | <b>x</b>               | -2.41533 | -0.87965 | -0.20075 |
|         | <b>y</b>               | -0.96749 | -2.86296 | 0.78508  |
|         | <b>z</b>               | -0.00069 | 0.77972  | -2.94508 |
| O3      | <b>x</b>               | -2.41491 | -0.87936 | -0.2009  |
|         | <b>y</b>               | -0.96718 | -2.86333 | 0.78509  |
|         | <b>z</b>               | -0.00093 | 0.77977  | -2.94586 |
| O4      | <b>x</b>               | -2.41533 | -0.87965 | 0.20075  |
|         | <b>y</b>               | -0.96749 | -2.86296 | -0.78508 |
|         | <b>z</b>               | 0.00069  | -0.77972 | -2.94508 |
| O5      | <b>x</b>               | -2.41491 | 0.87936  | 0.2009   |
|         | <b>y</b>               | 0.96718  | -2.86333 | 0.78509  |
|         | <b>z</b>               | 0.00093  | 0.77977  | -2.94586 |
| O6      | <b>x</b>               | -2.41533 | 0.87965  | -0.20075 |
|         | <b>y</b>               | 0.96749  | -2.86296 | -0.78508 |
|         | <b>z</b>               | -0.00069 | -0.77972 | -2.94508 |
| O7      | <b>x</b>               | -2.41491 | 0.87936  | -0.2009  |
|         | <b>y</b>               | 0.96718  | -2.86333 | -0.78509 |
|         | <b>z</b>               | -0.00093 | -0.77977 | -2.94586 |
| O8      | <b>x</b>               | -2.41533 | 0.87965  | 0.20075  |
|         | <b>y</b>               | 0.96749  | -2.86296 | 0.78508  |
|         | <b>z</b>               | 0.00069  | 0.77972  | -2.94508 |



|     |          |          |          |          |
|-----|----------|----------|----------|----------|
| Hf1 | <b>x</b> | 4.83024  | 0.00001  | 0.00005  |
|     | <b>y</b> | -0.00015 | 5.72629  | 0.29802  |
|     | <b>z</b> | 0.00011  | 0.45391  | 5.89094  |
| Hf2 | <b>x</b> | 4.83024  | 0.00001  | -0.00005 |
|     | <b>y</b> | -0.00015 | 5.72629  | -0.29802 |
|     | <b>z</b> | -0.00011 | -0.45391 | 5.89094  |
| Hf3 | <b>x</b> | 4.83024  | -0.00001 | 0.00005  |
|     | <b>y</b> | 0.00015  | 5.72629  | -0.29802 |
|     | <b>z</b> | 0.00011  | -0.45391 | 5.89094  |
| Hf4 | <b>x</b> | 4.83024  | -0.00001 | -0.00005 |
|     | <b>y</b> | 0.00015  | 5.72629  | 0.29802  |
|     | <b>z</b> | -0.00011 | 0.45391  | 5.89094  |

## References

- [1] K. Liu, B. Dang, Z. Yang, T. Zhang, Z. Yang, J. Bai, Z. Pan, R. Huang, Y. Yang, Tuning the ferroelectricity of  $\text{Hf}_{0.5}\text{Zr}_{0.5}\text{O}_2$  with alloy electrodes, *Sci. China Inf. Sci.* doi: 10.1007/s11432-023-3932-2.
- [2] R. Cao, Y. Wang, S. Zhao, Y. Yang, X. Zhao, W. Wang, X. Zhang, H. Lv, Q. Liu, M. Liu, Effects of capping electrode on ferroelectric properties of  $\text{Hf}_{0.5}\text{Zr}_{0.5}\text{O}_2$  thin films, *IEEE Electron. Device Lett.* 2018, 39 (8), 1207-1210.
- [3] P. Xu, S. Yan, Y. Zhu, J. Zang, P. Luo, G. Li, Q. Yang, Z. Chen, W. Zhang, X. Zheng, M. Tang, Effects of different metal electrodes on the ferroelectric properties of HZO thin films, *J. Mater. Sci: Mater. Electron.* 2023, 34 (28), 1915.
- [4] T. Shiraishi, S. Choi, T. Kiguchi, T. Shimizu, H. Funakubo, T. J. Konno, Formation of the orthorhombic phase in  $\text{CeO}_2\text{-HfO}_2$  solid solution epitaxial thin films and their ferroelectric properties, *Appl. Phys. Lett.* 2019, **114** (23), 232902.
- [5] S. Zheng, Z. Zhao, Z. Liu, B. Zeng, L. Yin, Q. Peng, M. Liao, Y. Zhou, Improvement of remanent polarization of  $\text{CeO}_2\text{-HfO}_2$  solid solution thin films on Si substrates by chemical solution deposition, *Appl. Phys. Lett.* 2020, **117** (21), 212904.
- [6] Y. Tian, Y. Zhou, M. Zhao, Y. Ouyang, X. Tao, Effect of Ce doping on ferroelectric  $\text{HfO}_2$  from first-principles: Implications for ferroelectric thin films and phase regulation, *Sol. Stat. Chem.* 2023,

328, 124316.

[7] S. S. Cheema, D. Kwon, N. Shanker, R. dos Reis, S.-L. Hsu, J. Xiao, H. Zhang, R. Wagner, A. Datar, M. R. McCarter, C. R. Serrao, A. K. Yadav, G. Karbasian, C.-H. Hsu, A. J. Tan, L.-C. Wang, V. Thakare, X. Zhang, A. Mehta, E. Karapetrova, R. V. Chopdekar, P. Shafer, E. Arenholz, C. Hu, R. Proksch, R. Ramesh, J. Ciston, S. Salahuddin, Enhanced ferroelectricity in ultrathin films grown directly on silicon, *Nature*, 2020, **580** (7804), 478-482.

[8] C. Lee, E. Cho, H. Lee, C. Hwang, S. Han, First-principles study on doping and phase stability of HfO<sub>2</sub>, *Phys. Rev. B*, 2008, 78, 012102.

[9] S. M. Park, S. G. Lee, S. E. Yun, Ferroelectric properties of Pb (Zr, Ti)O<sub>3</sub> films fabricated using a modified sol-gel based process, *Thin Solid Films*, 2008, 516, 5282-5286.

[10] M. Antik, K. L. Megan, E. B. Thomas, F. I. Jon, S. Nikhil, Oxygen vacancy contributions to the electrical stress response and endurance of ferroelectric hafnium zirconium oxide thin films, *Appl. Phys. Lett.* 2023, 122 (13), 132902.
